# Supplementary material for: Physically asymmetric division of the C. elegans zygote ensures invariably successful embryogenesis
Source: eLife. 2021 Feb 23;10:e61714. doi: 10.7554/eLife.61714 (PMC7972452; doi:10.7554/eLife.61714)
Supplement: Figure 6—figure supplement 1—source data 1. [file elife-61714-fig6-figsupp1-data1.xlsx]

## Sheet: Sheet2
	Phenotypes in equalized (AB 48-53%) and inverted embryos (AB < 48%)
	numbers indicate counts of embryos with / without indicated phenotype
			Ventral closure			4-cell configuration			EMS division			Msa/p positions			P4 division			ELT-2 expression			PHA-4 pattern
	total eq+inv		184			184			55			60			44			19			19
	normal:		normal	Failed Ventral closure		normal	T-like 4-cell configuratio		normal	skewed EMS division		normal	MSa/MSp inversion		normal	Extra P4 division		normal	Abberant ELT-2::GFP		normal	ectopic pharynx PHA-4::GFP
	eq. alive		73	0.396739		72	0.391304		16	0.290909		18	0.3		10	0.227273		2	0.105263		4	0.210526
	eq. dead		0	0		84	0.456522		23	0.418182		12	0.2		14	0.318182		4	0.210526		7	0.368421
	inverted		0	0		17	0.0923913		4	0.0727273		2	0.0333333		0	0		0	0		1	0.0526316
	abnormal:			Failed Ventral closure			T-like 4-cell configuratio			skewed EMS division			MSa/MSp inversion			Extra P4 division			Aberrant gut (ELT-2::GFP)			ectopic pharynx PHA-4::GFP
	eq. alive		0	0		0	0		4	0.0727273		5	0.0833333		4	0.0909091		4	0.210526		0	0
	eq. dead		91	0.494565		7	0.0380435		5	0.0909091		18	0.3		12	0.272727		7	0.368421		5	0.263158
	inverted		21	0.11413		4	0.0217391		3	0.0545455		5	0.0833333		4	0.0909091		2	0.105263		2	0.105263
