# Supplementary material for: Papyrus inédits d'Edfou de la collection de l'Ifao
Source: eLife journal article supplement (doi:10.7554/elife.61714), 1998-01-01
Supplement: supp [file elife-61714-supp-v1.zip]

Figure 1 - supplement 3

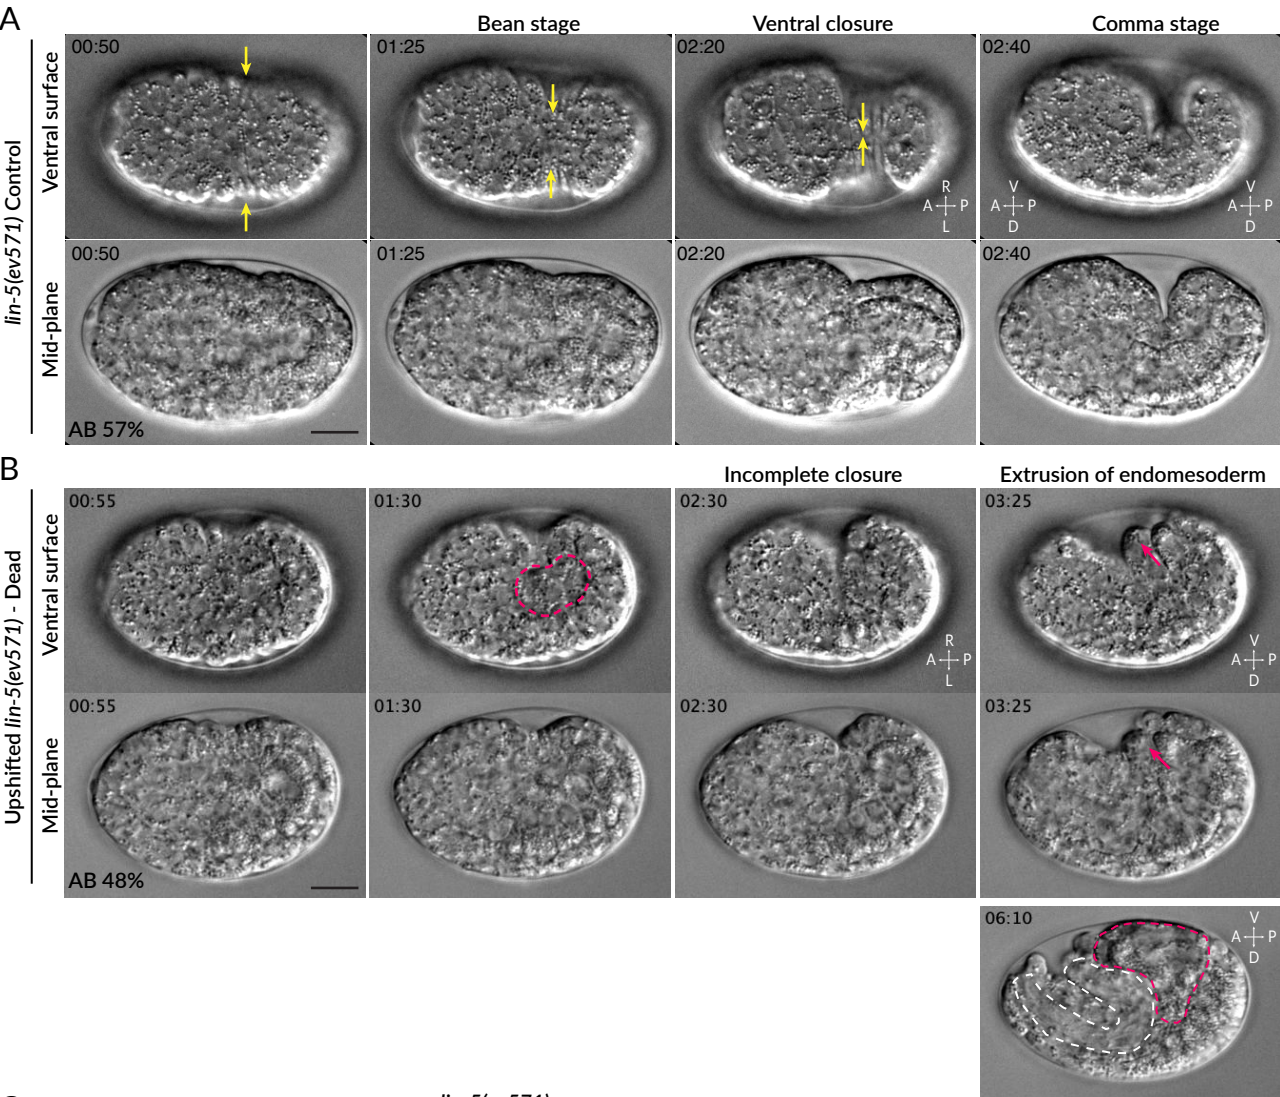

**C**

*lin-5(ev571)*

|                            | Controls |    |     | Equalized |    |     | Fisher test p-value |      |
|----------------------------|----------|----|-----|-----------|----|-----|---------------------|------|
|                            | +        | N  | %   | +         | N  | %   |                     |      |
| Dead as L1/L2              | 2        | 20 | 10% | 6         | 22 | 27% | 0.243               | n.s. |
| Visible adult phenotypes * | 3        | 18 | 17% | 9         | 16 | 56% | 0.030               | *    |
| Reduced fertility **       | 1        | 18 | 6%  | 8         | 16 | 50% | 0.006               | *    |

\* egl / ste / pv / gonad missing / less than 100 progeny

\*\* less than 50 progeny
