# Supplementary figures and images for: Papyrus inédits d'Edfou de la collection de l'Ifao
Source: eLife journal article supplement (doi:10.7554/elife.61714), 1998-01-01

Figure 6 - supplement 2

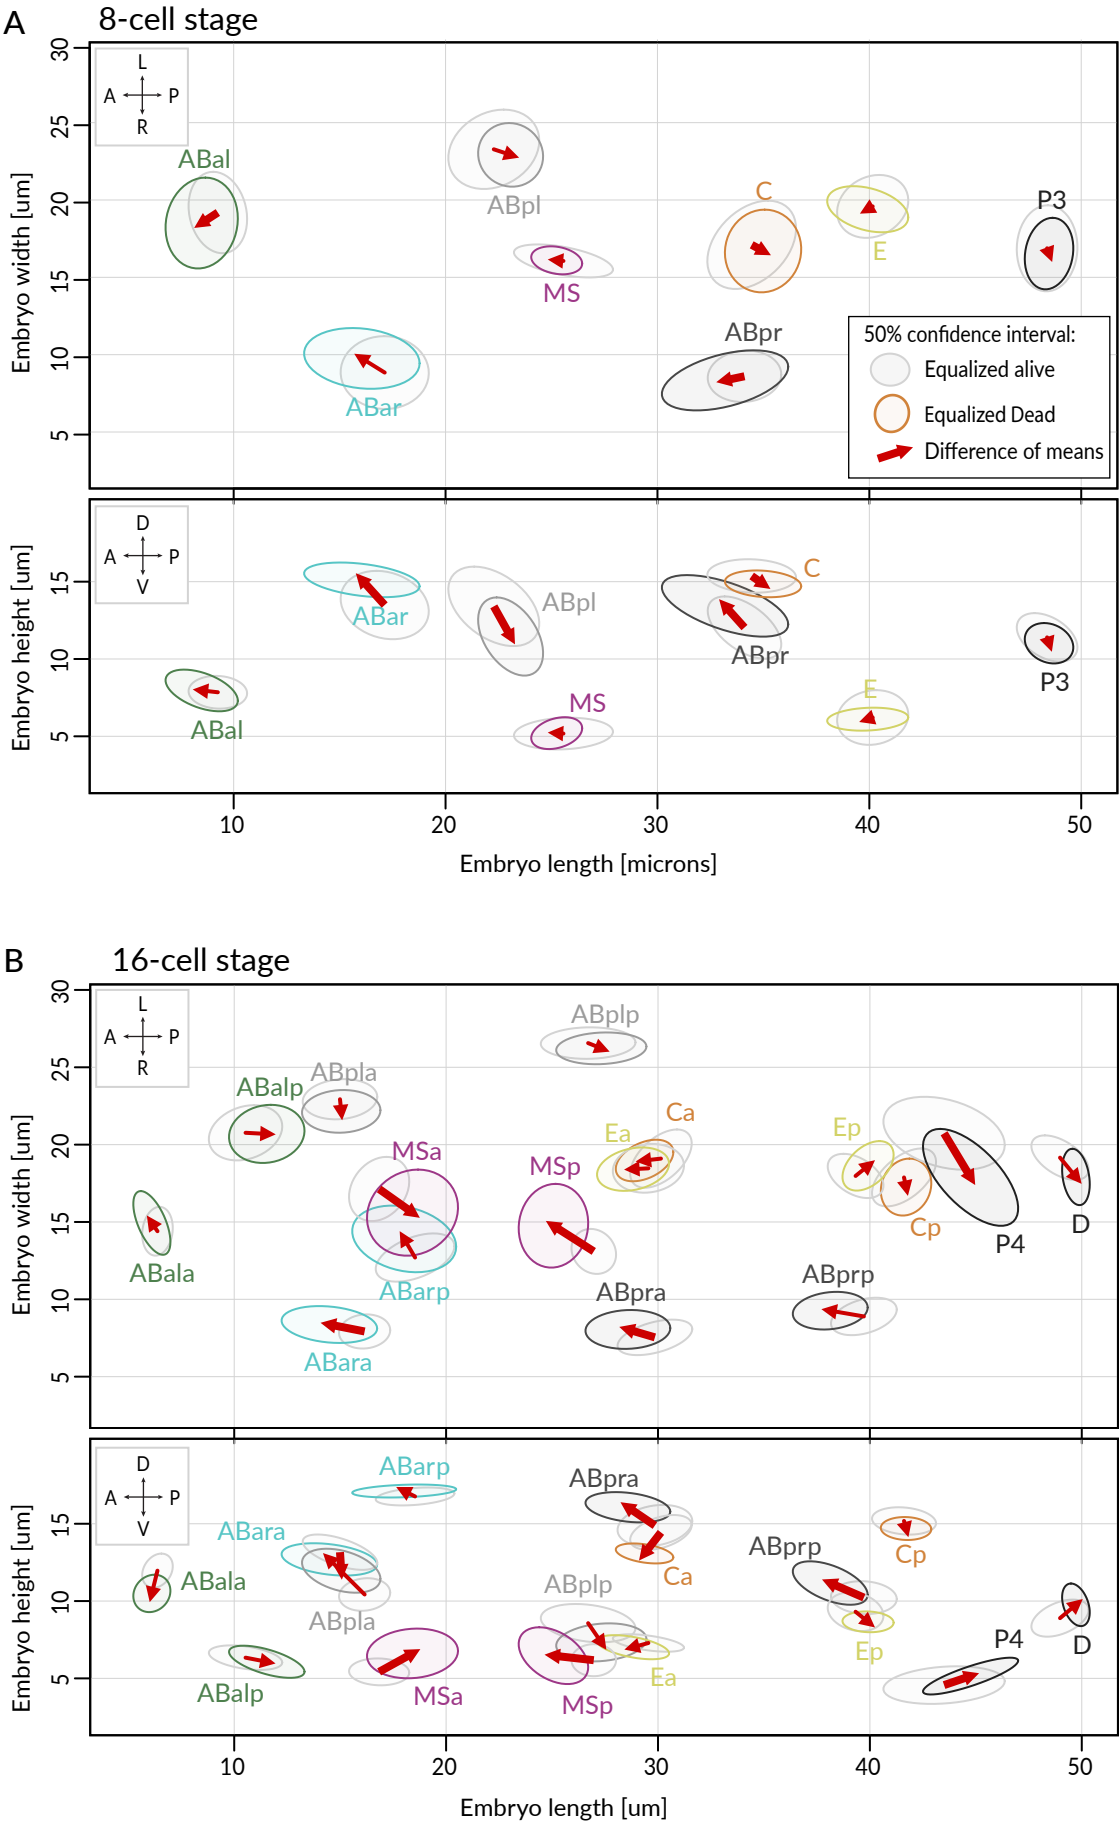

Supplement: supp [file elife-61714-supp-v1.zip]

Figure 5 - supplement

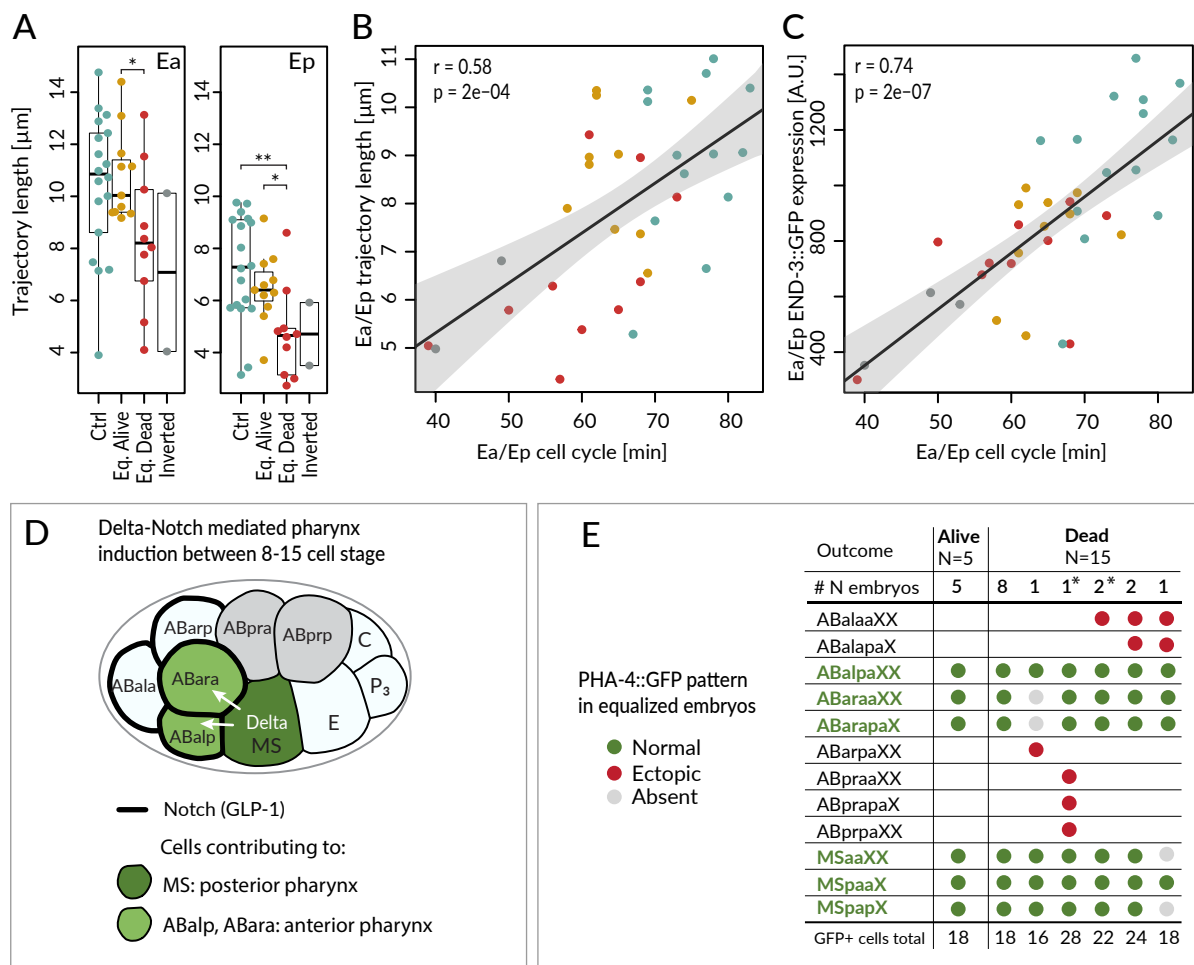

Supplement: supp [file elife-61714-supp-v1.zip]

Figure 1 - supplement 2

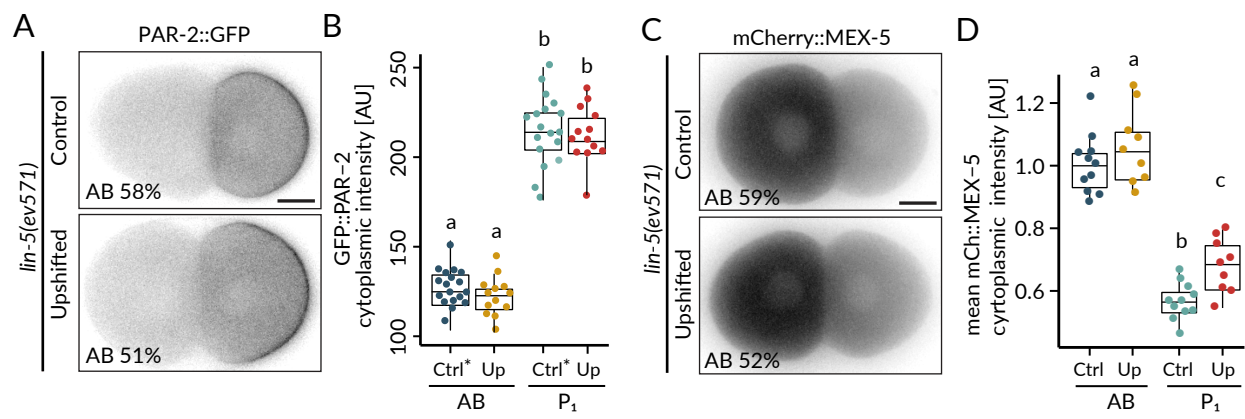

Supplement: supp [file elife-61714-supp-v1.zip]

Figure 3 - supplement 1

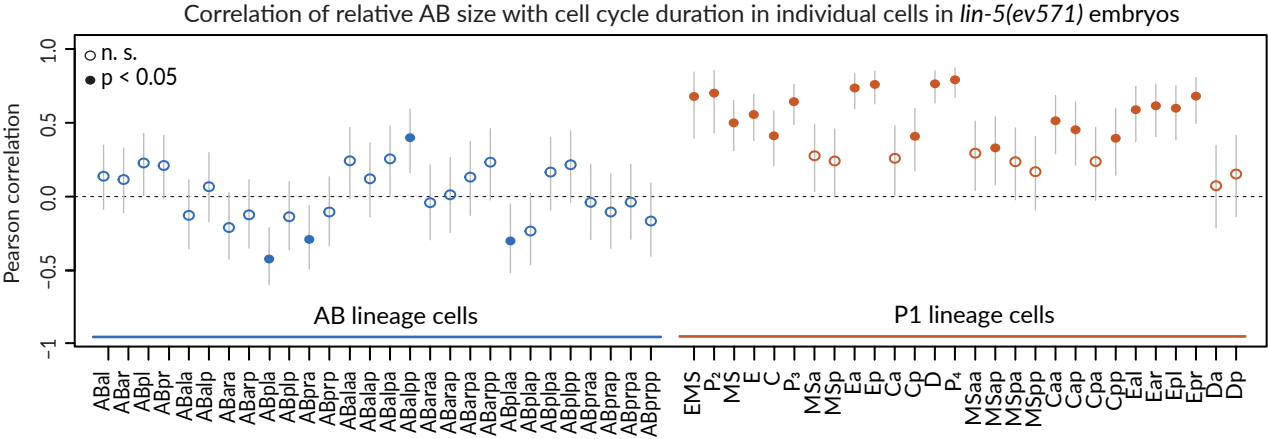

Supplement: supp [file elife-61714-supp-v1.zip]

Figure 6 - supplement 3

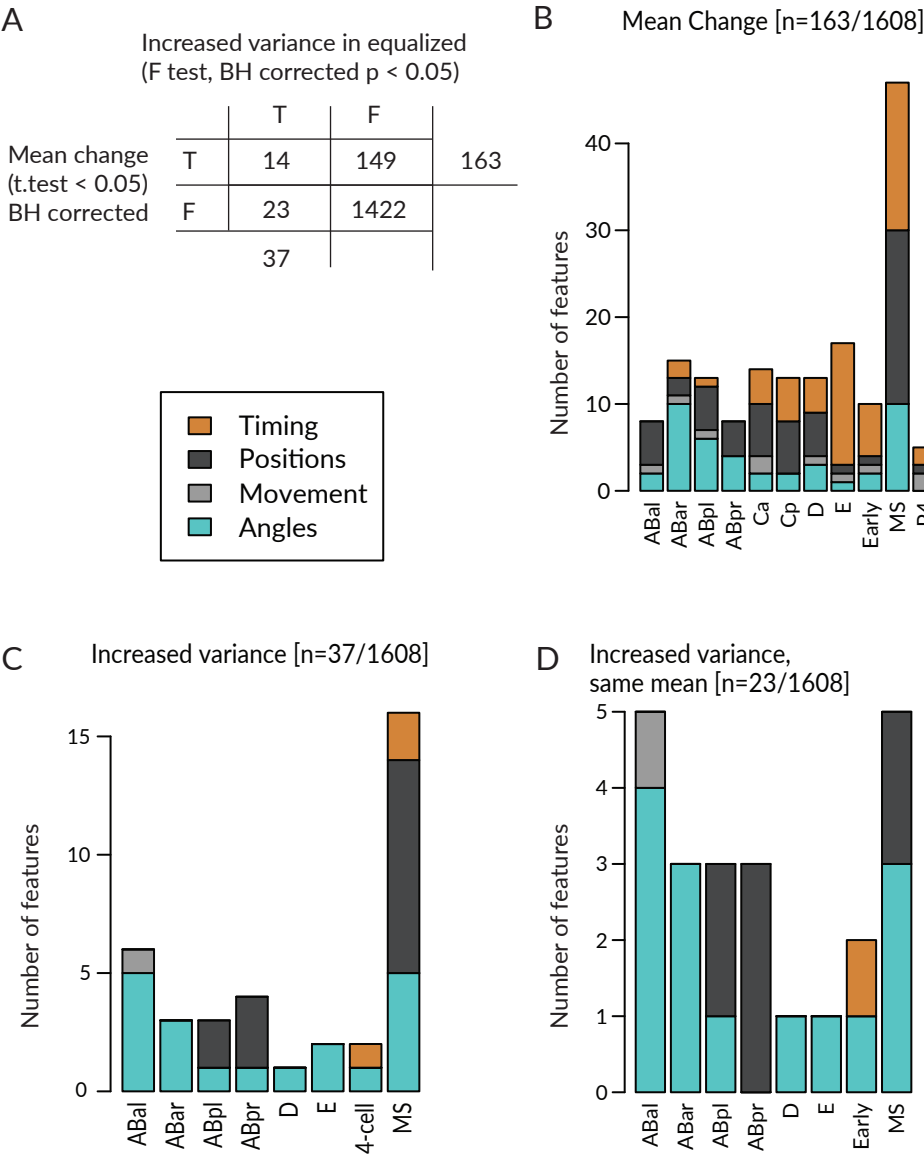

Supplement: supp [file elife-61714-supp-v1.zip]

Figure 6 - supplement 1

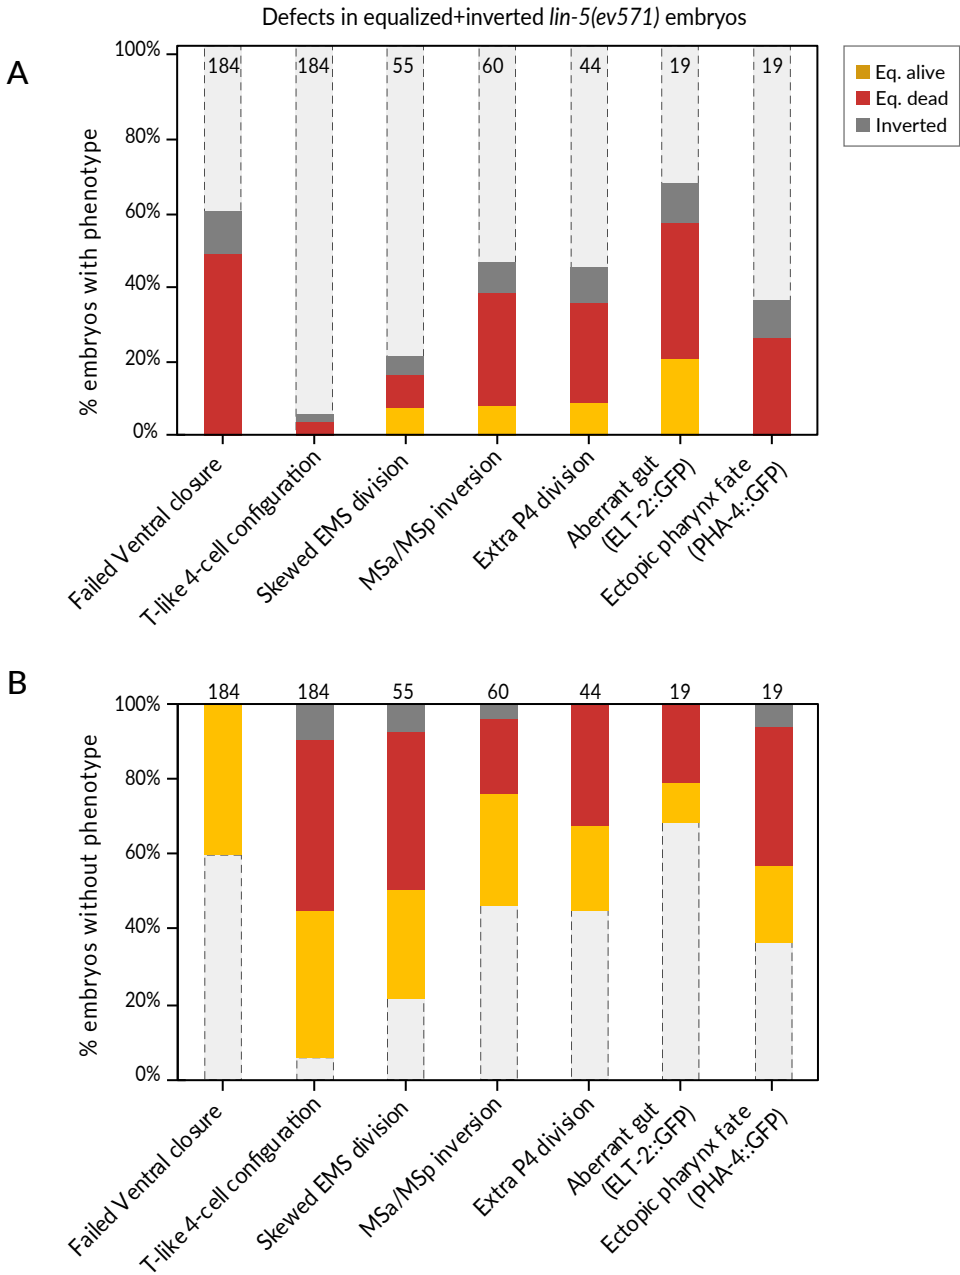

Supplement: supp [file elife-61714-supp-v1.zip]

Figure 2 - supplement 1

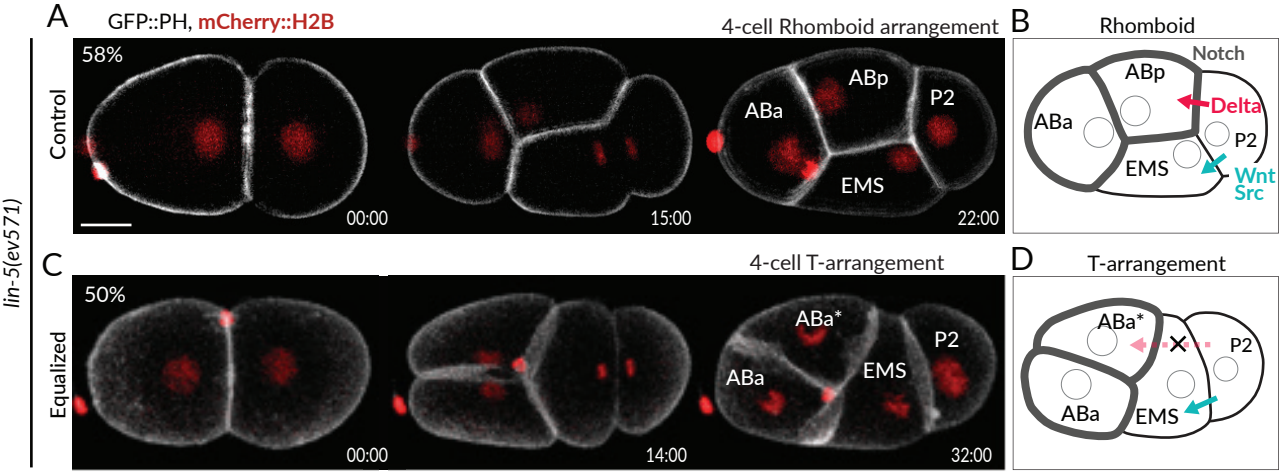

Supplement: supp [file elife-61714-supp-v1.zip]

Figure 4 - supplement 1

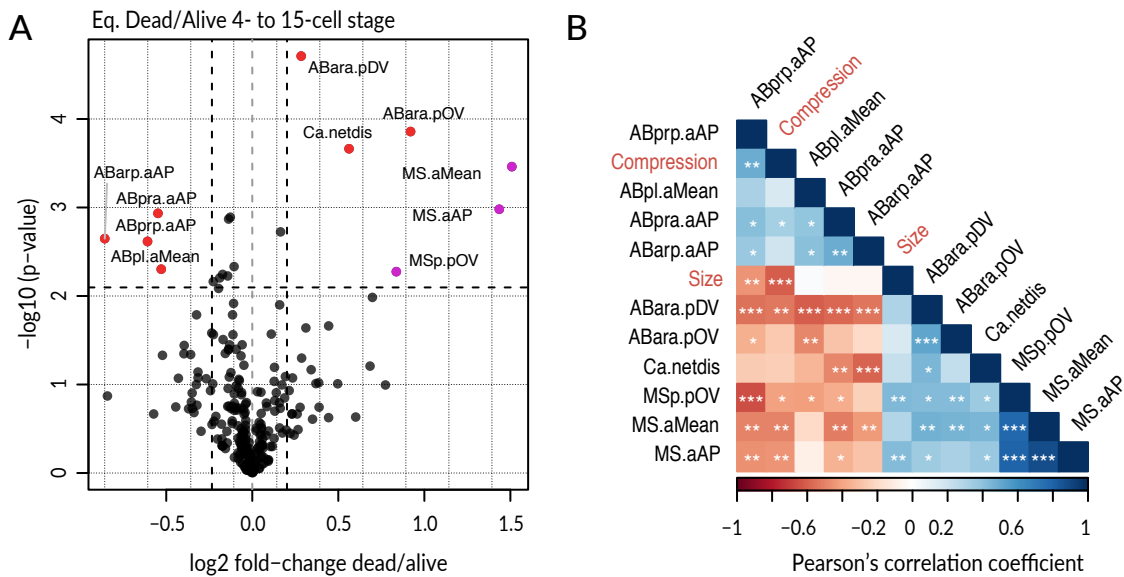

Supplement: supp [file elife-61714-supp-v1.zip]

Figure 1 - supplement 1

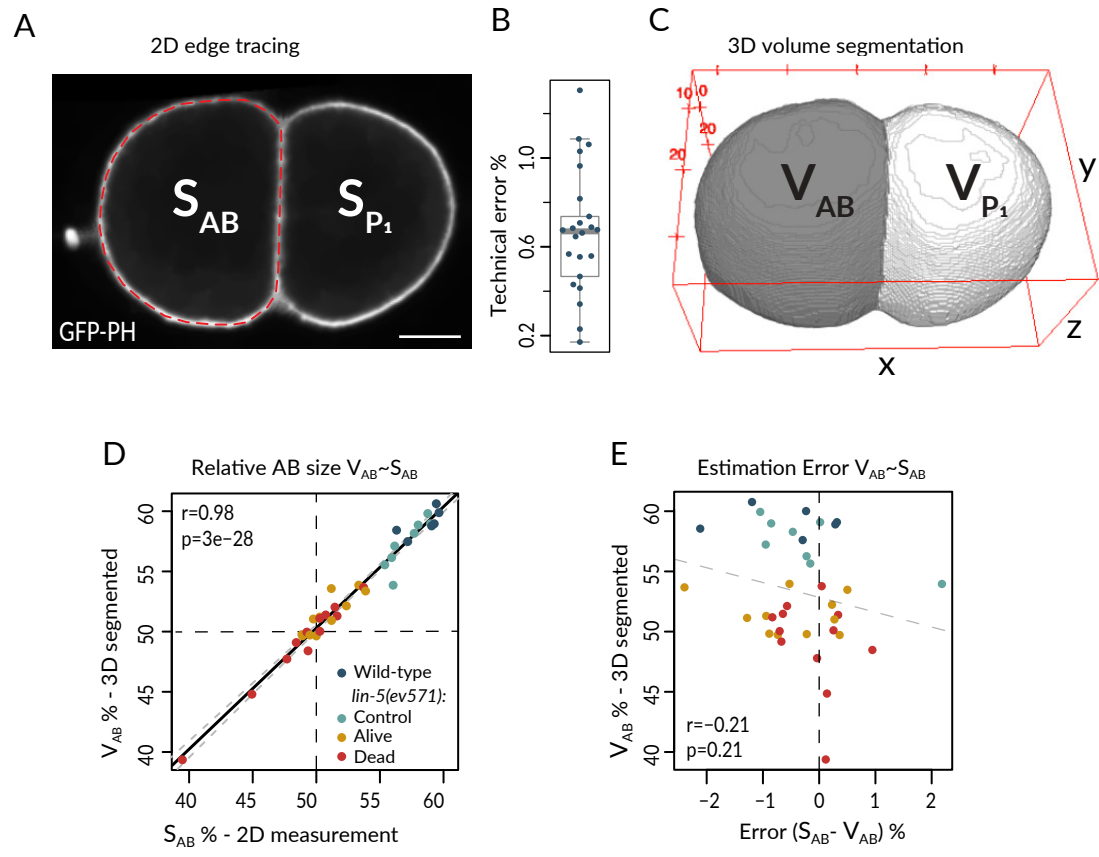

Supplement: supp [file elife-61714-supp-v1.zip]
